# Supplementary material
Source: PubMed Central journal article supplement (PMC3710751)
Supplement: mmc1.pdf [file mmc1.pdf]

The American Journal of Human Genetics, Volume 93

**Supplemental Data**

**Dissecting Disease Inheritance Modes  
in a Three-Dimensional Protein Network**

**Challenges the “Guilt-by-Association” Principle**

Yu Guo, Xiaomu Wei, Jishnu Das, Andrew Grimson, Steven M. Lipkin, Andrew G. Clark, and Haiyuan Yu

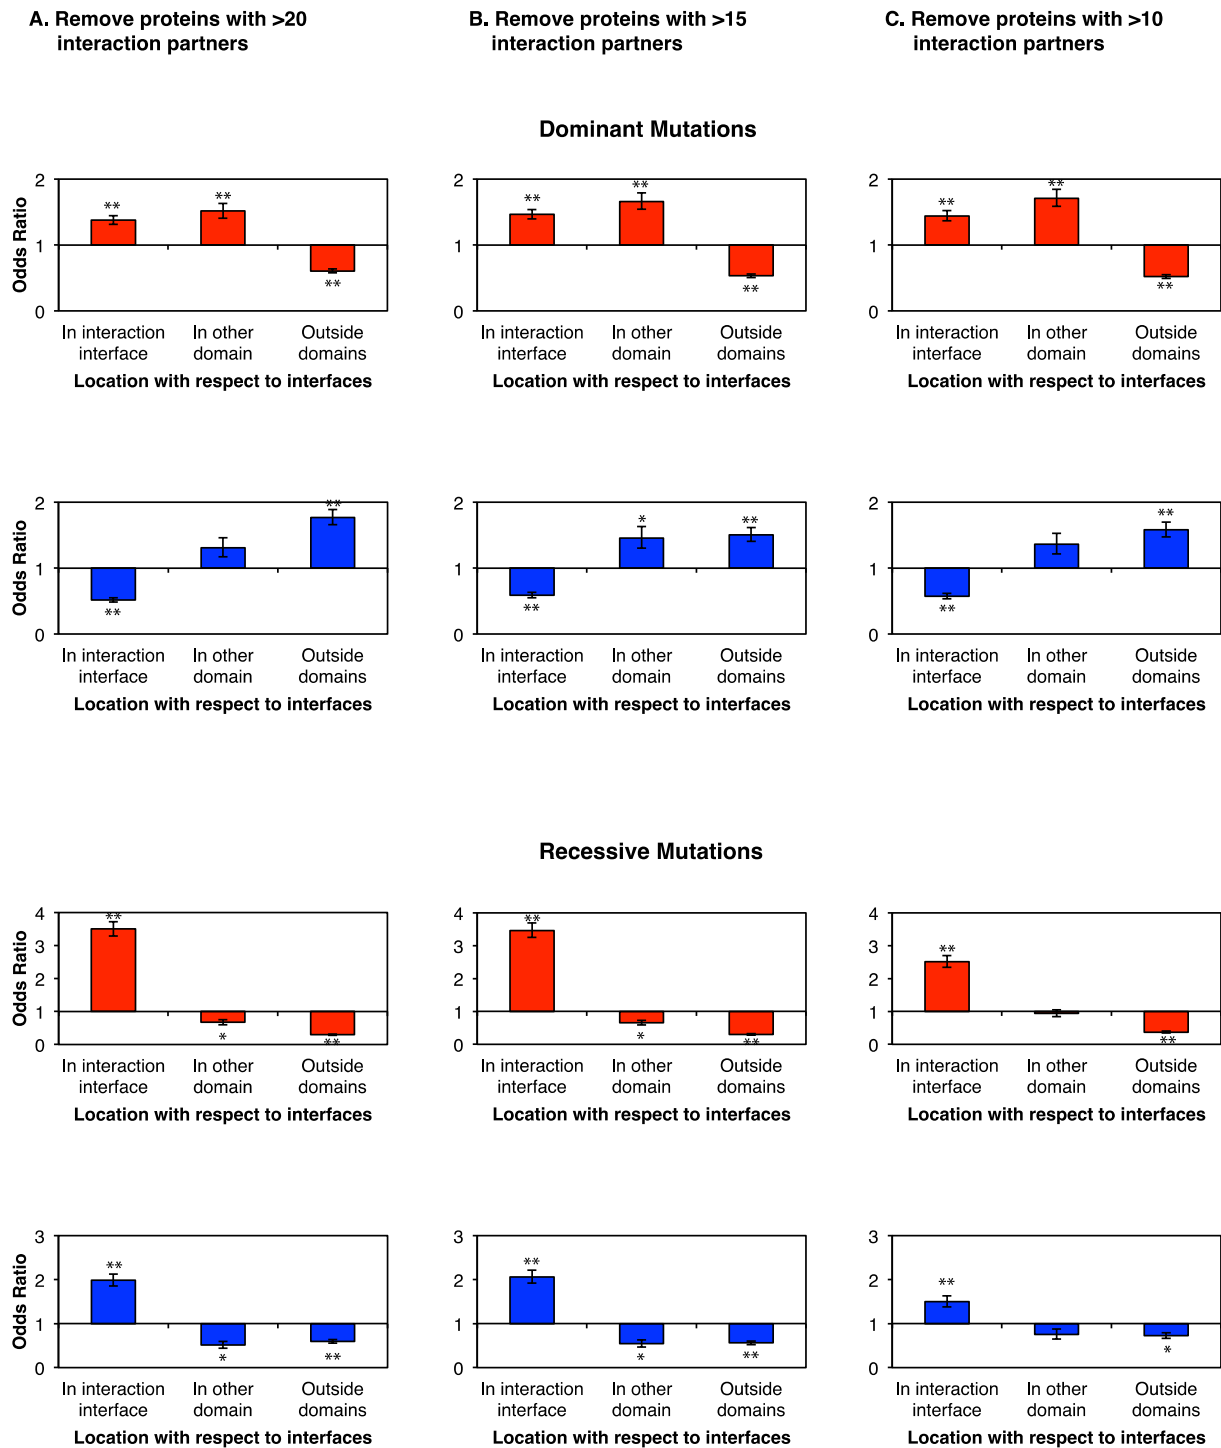

**Figure S1. Distribution of Recessive and Dominant Disease Mutations with Respect to Interaction Interfaces after Removal of Protein Hubs**

Error bars represent 95% confidence intervals of odds ratios.  $**p < 10^{-20}$ ,  $*p < 10^{-10}$ . The p values are calculated using Z-tests for log odds ratio. Red: in-frame mutations. Blue: truncating mutations.

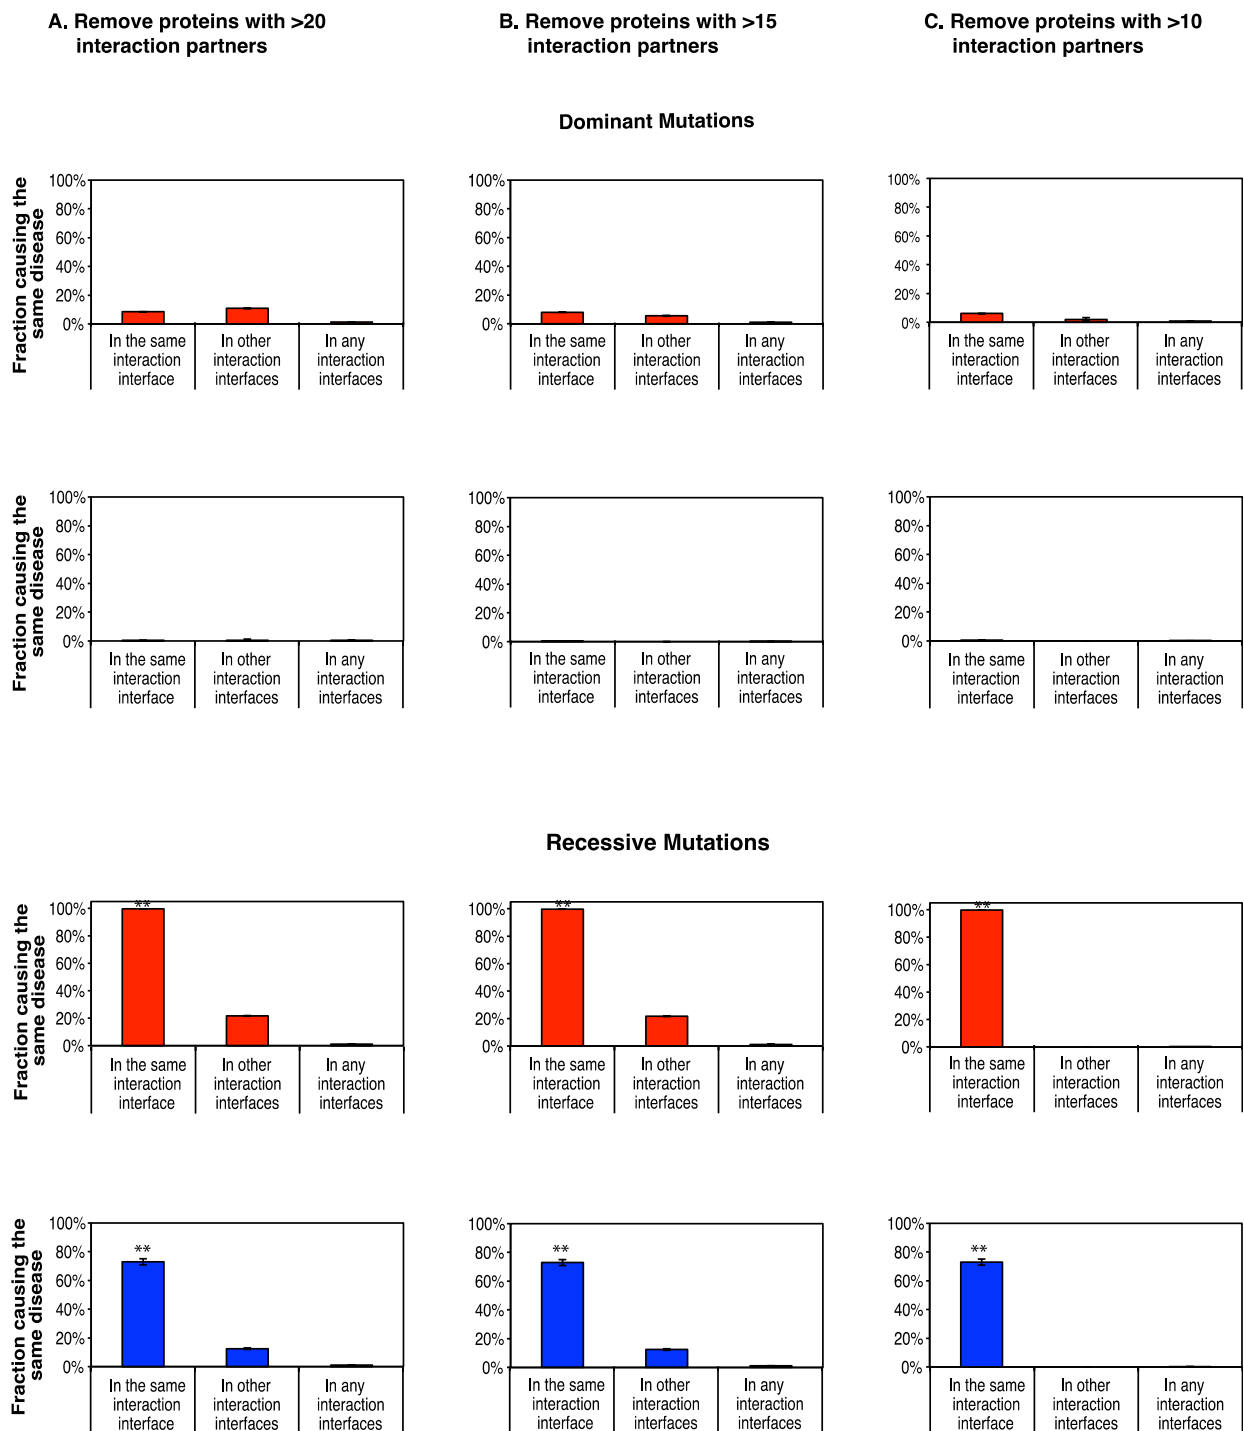

**Figure S2. Analysis of Locus Heterogeneity among Dominant and Recessive Disease Mutations after Removal of Protein Hubs**

Error bars represent  $\pm$ SE.  $**p < 10^{-20}$ . The p values are calculated using cumulative binomial tests. Red: in-frame mutations. Blue: truncating mutations.

**A. Remove domains with >60 interaction partners on average**

**B. Remove domains with >40 interaction partners on average**

**C. Remove domains with >20 interaction partners on average**

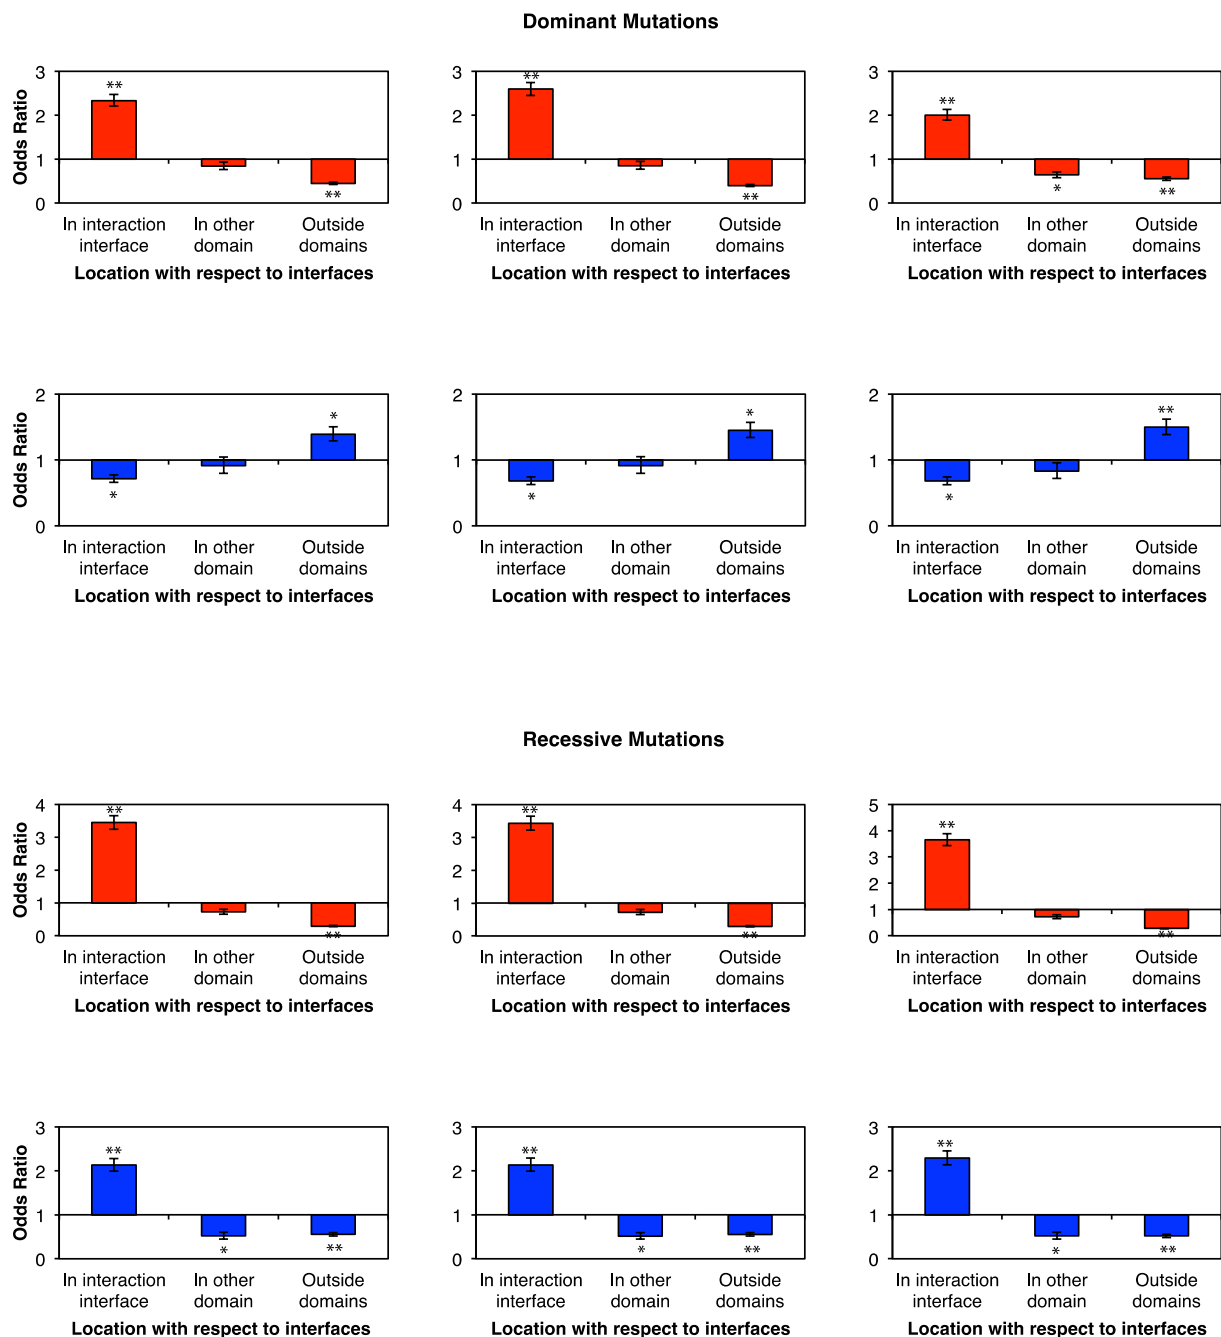

**Figure S3. Distribution of Recessive and Dominant Disease Mutations with Respect to Interaction Interfaces after Removal of Domain Hubs**

Error bars represent 95% confidence intervals of odds ratios.  $**p < 10^{-20}$ ,  $*p < 10^{-10}$ . The p values are calculated using Z-tests for log odds ratio. Red: in-frame mutations. Blue: truncating mutations. Note that the enrichment of dominant mutations in other domains decreased after the removal of domain hubs, suggesting that this enrichment might be due to over-represented domains in the 3D protein interactome network.

**A. Remove domains with >60 interaction partners on average**      **B. Remove domains with >40 interaction partners on average**      **C. Remove domains with >20 interaction partners on average**

**Dominant Mutations**

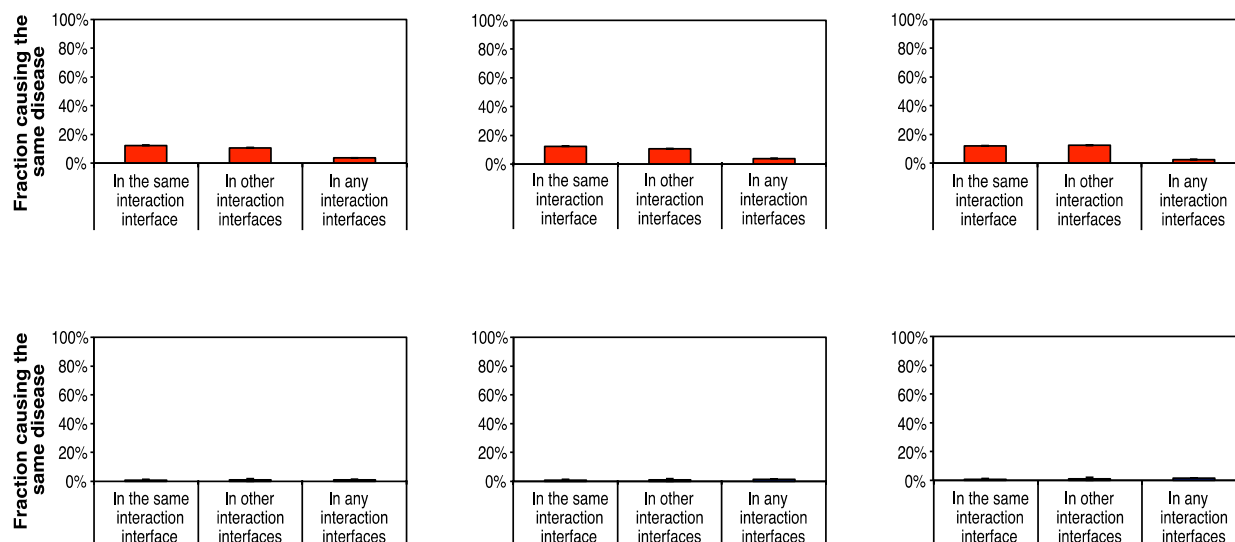

**Recessive Mutations**

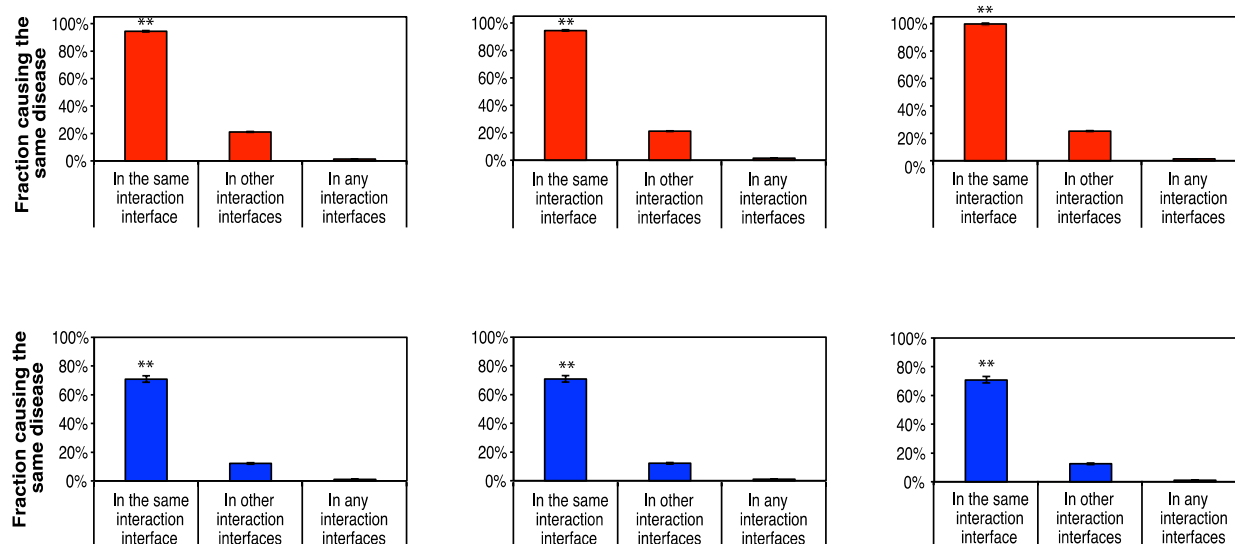

**Figure S4. Analysis of Locus Heterogeneity among Dominant and Recessive Disease Mutations after Removal of Domain Hubs**

Error bars represent  $\pm$ SE.  $**p < 10^{-20}$ . The p values are calculated using cumulative binomial tests. Red: in-frame mutations. Blue: truncating mutations.

**A**

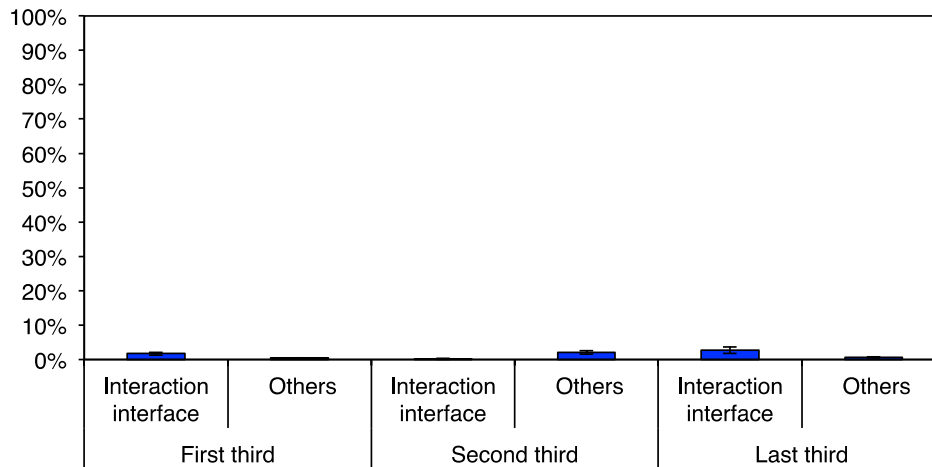

**B**

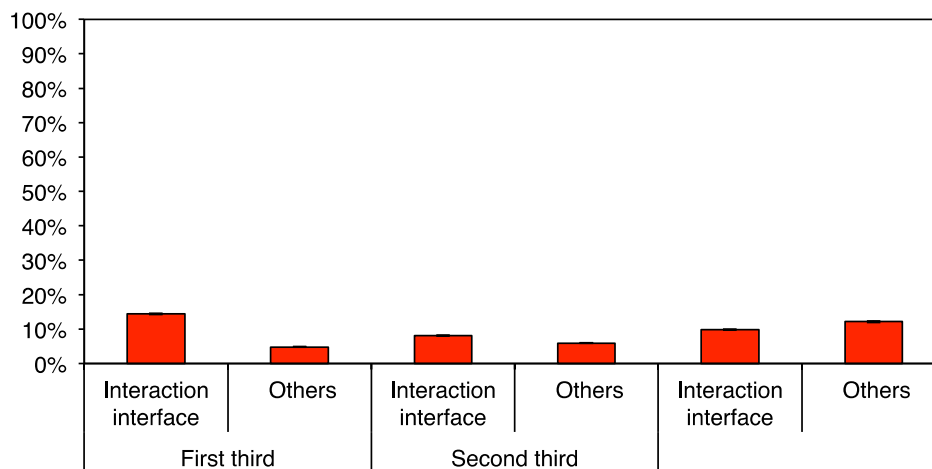

**Figure S5. Analysis of the Effect of Mutation Location on Locus Heterogeneity of Dominant Disease Mutations**

(A) Percentage of dominant truncating mutations located on different parts of the protein that cause the same disease with mutations on its interaction partner.

(B) Percentage of dominant in-frame mutations located on different parts of the protein that cause the same disease with mutations on its interaction partner.

### A Dominant mutations

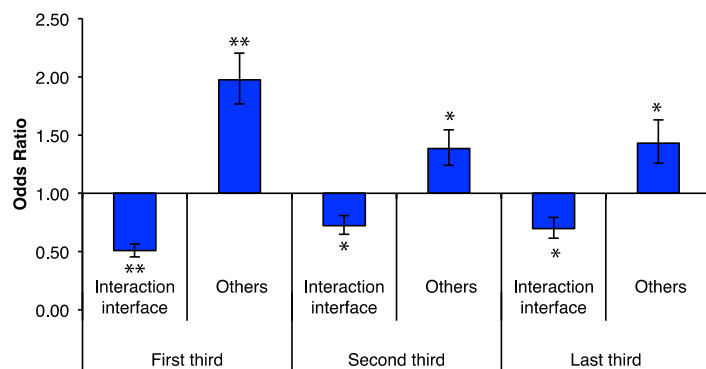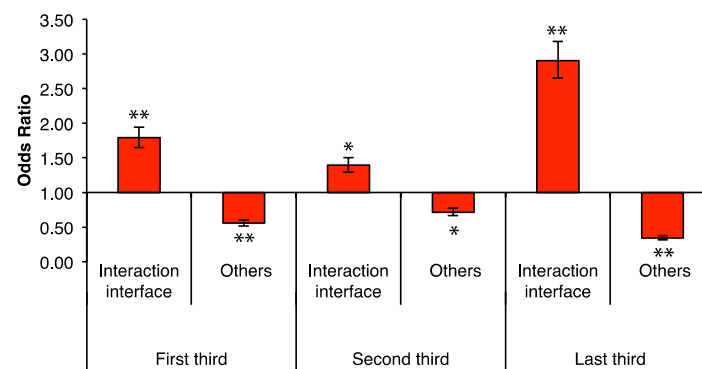

### B Recessive mutations

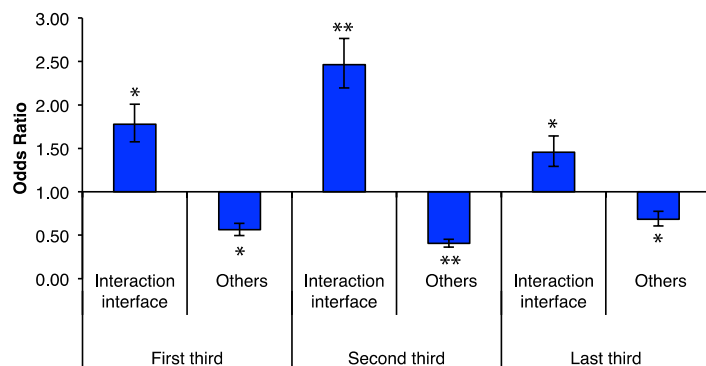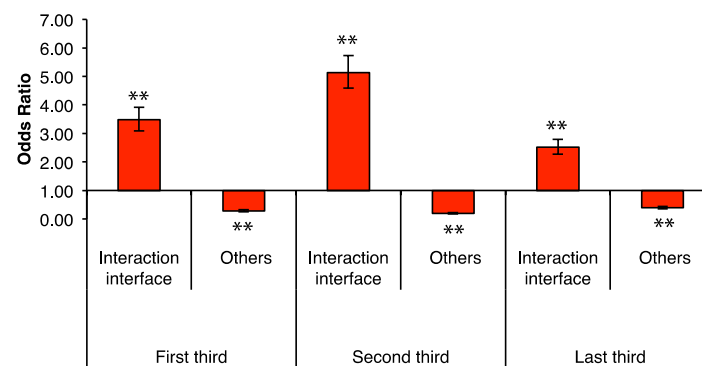

**Figure S6. Effect of Mutation Location Relative to the N Terminus on the Mutation Distribution Patterns**

(A) Odds ratios of the distributions of dominant truncating (left) and in-frame (right) mutations on different locations of proteins.

(B) Odds ratios of the distributions of recessive truncating (left) and in-frame (right) mutations on different locations of proteins. Error bars represent 95% confidence intervals of odds ratios. \*\* $p < 10^{-20}$ , \* $p < 10^{-5}$ . The p values are calculated using Z-tests for log odds ratio.

A

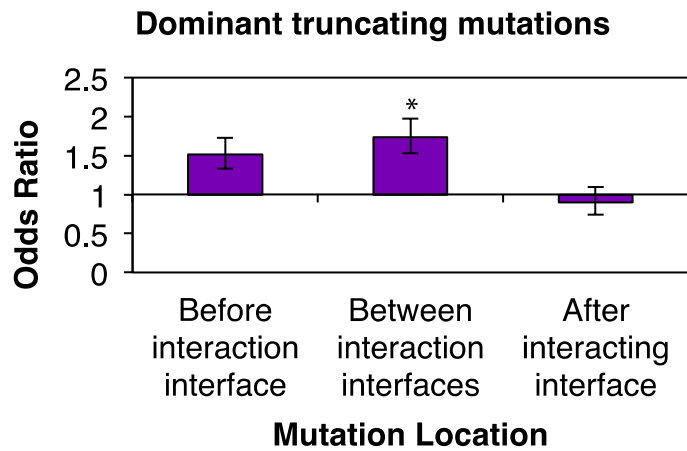

B

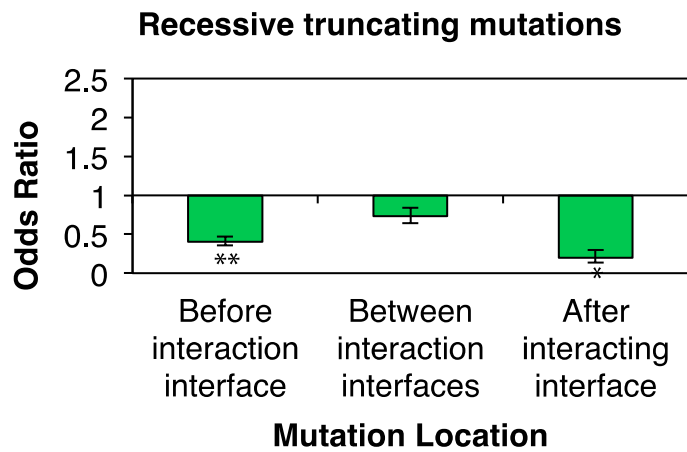

**Figure S7. Distribution of Recessive and Dominant Truncating Mutations outside of Interaction Interfaces**

(A) Odds ratios of the distribution of dominant truncating mutations outside of interaction interfaces.

(B) Odds ratios of the distribution of recessive truncating mutations outside of interaction interfaces. Error bars represent 95% confidence intervals of odds ratios. \*\* $p < 10^{-20}$ , \* $p < 10^{-10}$ . The p values are calculated using Z-tests for log odds ratio.



## A Dominant mutations

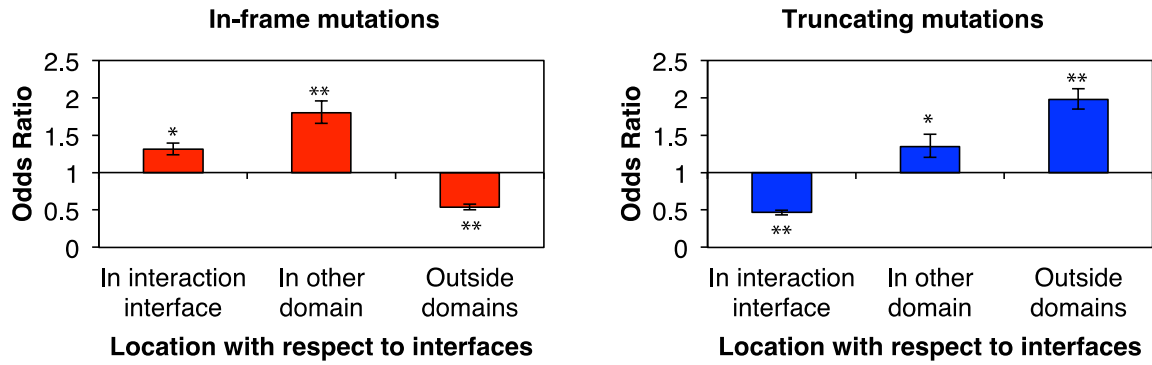

## B Recessive mutations

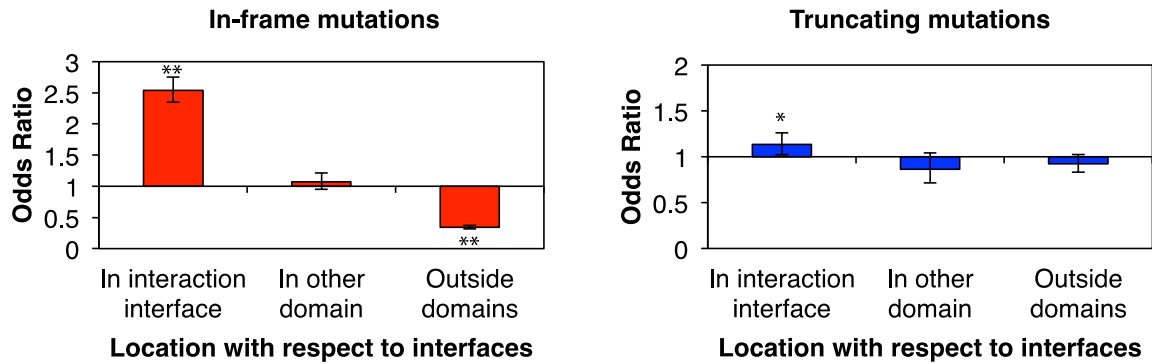

**Figure S8. Distribution of Recessive and Dominant Disease Mutations from HGMD with Respect to Interaction Interfaces**

(A) Odds ratios of the distributions of dominant in-frame (left) and truncating (right) mutations on different locations of proteins.

(B) Odds ratios of the distribution of recessive in-frame (left) and truncating (right) mutations on different locations of proteins. Error bars represent 95% confidence intervals of odds ratios. \*\* $p < 10^{-20}$ , \* $p < 0.05$ . The p values are calculated using Z-tests for log odds ratio.

## A In-frame mutations

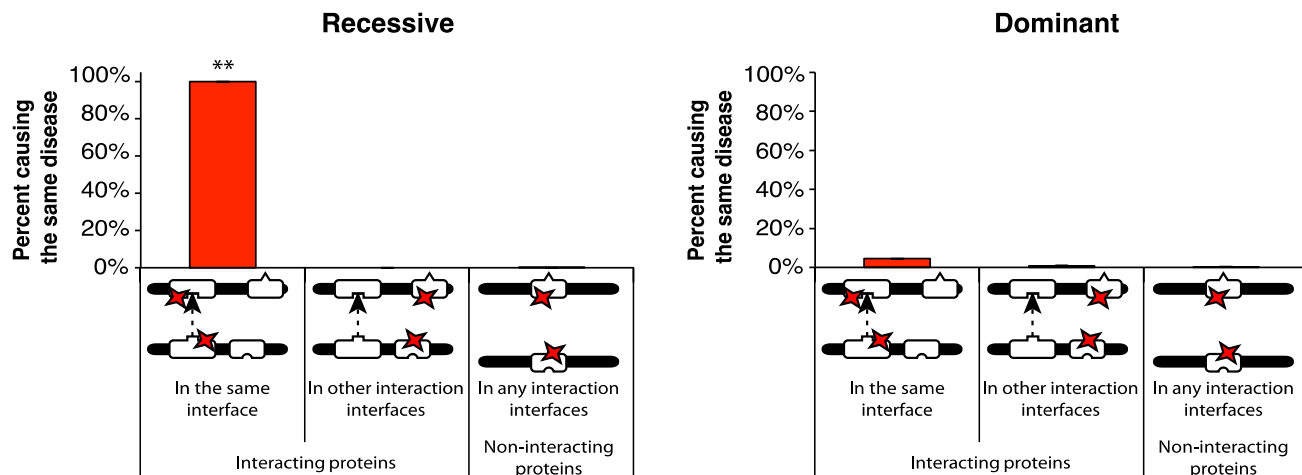

## B Truncating mutations

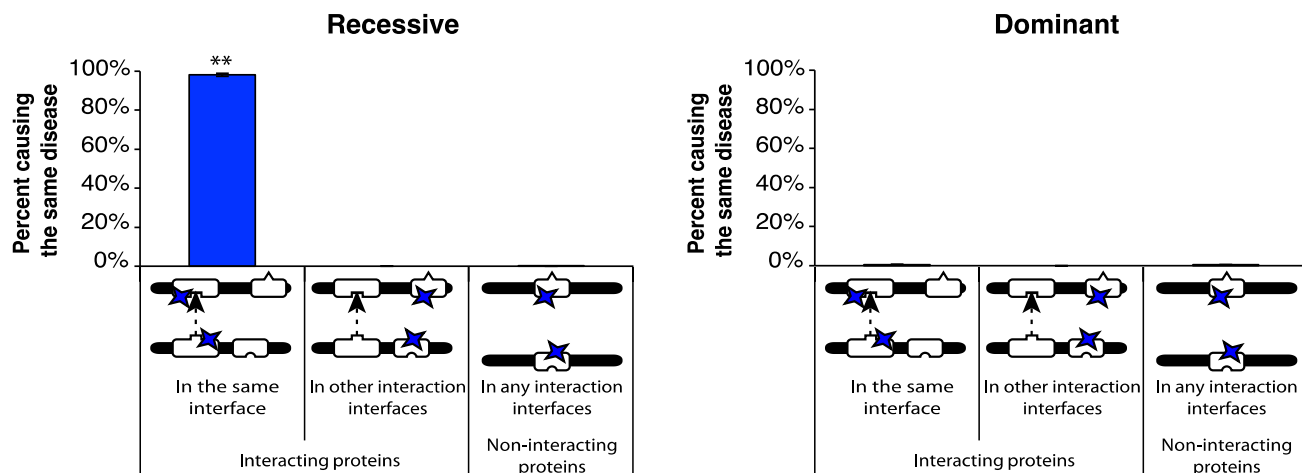

**Figure S9. Analysis of Locus Heterogeneity among Dominant and Recessive HGMD Disease Mutations**

(A) Percentage of recessive (left) or dominant (right) in-frame mutation pairs on two different proteins causing the same disease.

(B) Percentage of recessive (left) or dominant (right) truncating mutation pairs on two different proteins causing the same disease. Error bars represent  $\pm$ SE.  $**p < 10^{-20}$ . The p values are calculated using cumulative binomial tests.

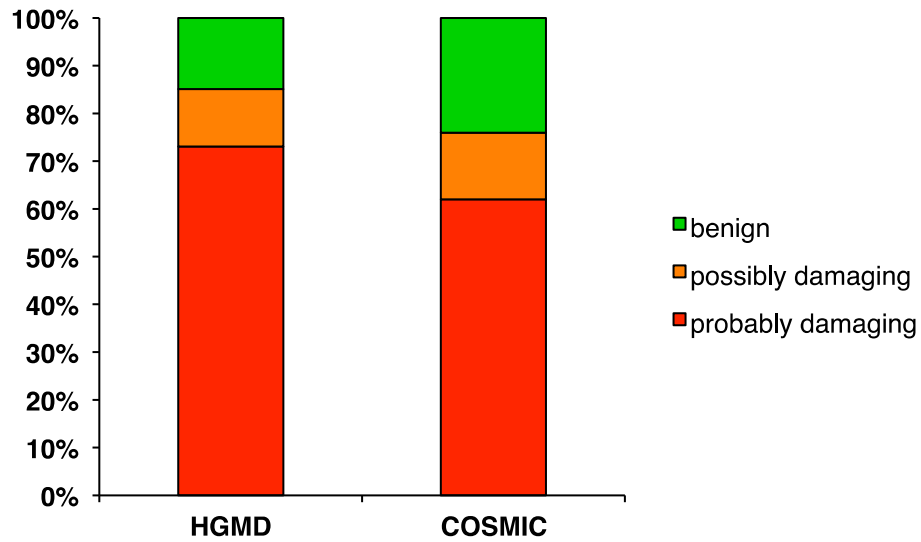

**Figure S10. PolyPhen-2 Predictions on the Missense Mutations Used for the Analyses (HumVar Model)**

**Table S1. Network Statistics of the 3D Protein Interactome Network**

| Average Degree | Clustering Coefficient | Characteristic Path Length | Diameter |
|----------------|------------------------|----------------------------|----------|
| 2.73           | 0.216                  | 8.7                        | 27       |

**Table S2. Sample Sizes Used in the Calculations**

**Figure 2. Distribution of Dominant and Recessive Mutations**

| Location of Mutations     | Dominant |            | Recessive |            |
|---------------------------|----------|------------|-----------|------------|
|                           | In-Frame | Truncating | In-Frame  | Truncating |
| In interaction interfaces | 4421     | 1398       | 3620      | 2119       |
| In other domains          | 764      | 355        | 410       | 188        |
| Outside domains           | 2339     | 2013       | 1122      | 1243       |

**Figure 3A. Locus Heterogeneity of Recessive In-Frame Mutations**

| Location of Mutation Pairs on the Interacting Proteins |                      | Same Disease | Different Diseases |
|--------------------------------------------------------|----------------------|--------------|--------------------|
| Interacting genes                                      | Same interface       | 2145         | 296                |
|                                                        | Different interfaces | 3158         | 11882              |
| Non-interacting genes                                  | Any interfaces       | 69832        | 5257750            |

**Figure 3A. Locus Heterogeneity of Dominant In-Frame Mutations**

| Location of Mutation Pairs on the Interacting Proteins |                      | Same Disease | Different Diseases |
|--------------------------------------------------------|----------------------|--------------|--------------------|
| Interacting genes                                      | Same interface       | 7138         | 63539              |
|                                                        | Different interfaces | 2490         | 21066              |
| Non-interacting genes                                  | Any interfaces       | 154193       | 8273199            |

**Figure 3B. Locus Heterogeneity of Recessive Truncating Mutations**

| Location of Mutation Pairs on the Interacting Proteins |                      | Same Disease | Different Diseases |
|--------------------------------------------------------|----------------------|--------------|--------------------|
| Interacting genes                                      | Same interface       | 307          | 197                |
|                                                        | Different interfaces | 484          | 3569               |
| Non-interacting genes                                  | Any interfaces       | 20010        | 1758000            |

**Figure 3B. Locus Heterogeneity of Dominant Truncating Mutations**

| Location of Mutation Pairs on the Interacting Proteins |                      | Same Disease | Different Diseases |
|--------------------------------------------------------|----------------------|--------------|--------------------|
| Interacting genes                                      | Same interface       | 6            | 1282               |
|                                                        | Different interfaces | 1            | 168                |
| Non-interacting genes                                  | Any interfaces       | 4076         | 864499             |

**Figure 4A. Locus Heterogeneity of Haploinsufficient (HI) In-Frame Mutations**

| Location of Mutation Pairs on the Interacting Proteins |                      | Same Disease | Different Diseases |
|--------------------------------------------------------|----------------------|--------------|--------------------|
| Interacting genes                                      | Same interface       | 1909         | 7275               |
|                                                        | Different interfaces | 772          | 5711               |
| Non-interacting genes                                  | Any interfaces       | 25823        | 1233426            |

**Figure 4A. Locus Heterogeneity of non-HI In-Frame Mutations**

| Location of Mutation Pairs on the Interacting Proteins |                      | Same Disease | Different Diseases |
|--------------------------------------------------------|----------------------|--------------|--------------------|
| Interacting genes                                      | Same interface       | 2360         | 22805              |
|                                                        | Different interfaces | 938          | 8014               |
| Non-interacting genes                                  | Any interfaces       | 42080        | 2902891            |

**Figure 4B. Distribution of HI vs. non-HI Truncating Mutations**

| Location of Mutations     | HI  | non-HI |
|---------------------------|-----|--------|
| In interaction interfaces | 516 | 882    |
| In other domains          | 113 | 242    |
| Outside domains           | 401 | 1611   |

**Figure 5A. Locus Heterogeneity of Truncating Recessive Mutations in Thirds**

| Location of Mutation Pairs on the Interacting Proteins |                          | Same Disease | Different Diseases |
|--------------------------------------------------------|--------------------------|--------------|--------------------|
| First third                                            | In interaction interface | 170          | 150                |
|                                                        | Others                   | 277          | 1828               |
| Second third                                           | In interaction interface | 242          | 114                |
|                                                        | Others                   | 160          | 1127               |
| Last third                                             | In interaction interface | 208          | 182                |
|                                                        | Others                   | 115          | 367                |

**Figure 5B. Locus Heterogeneity of In-Frame Recessive Mutations in Thirds**

| <b>Location of Mutation Pairs on the Interacting Proteins</b> |                          | <b>Same Disease</b> | <b>Different Diseases</b> |
|---------------------------------------------------------------|--------------------------|---------------------|---------------------------|
| First third                                                   | In interaction interface | 936                 | 103                       |
|                                                               | Others                   | 1429                | 2448                      |
| Second third                                                  | In interaction interface | 2193                | 240                       |
|                                                               | Others                   | 540                 | 1481                      |
| Last third                                                    | In interaction interface | 1525                | 309                       |
|                                                               | Others                   | 432                 | 614                       |

**Figure 6A. Enrichment of Truncating Mutations in between Interacting Interfaces**

|                                | <b>Dominant</b> | <b>Recessive</b> |
|--------------------------------|-----------------|------------------|
| Between interacting interfaces | 302             | 265              |
